# Supplementary material for: Gas–solid reactions between the different polymorphic modifications of barbituric acid and amines
Source: Royal Society of Chemistry journal article supplement (doi:10.1039/b603910c), 2006-01-01
Supplement: b603910c.pdf [file b603910c.pdf]

|             |       |
|-------------|-------|
| 5.020000000 | 160.9 |
| 5.040000000 | 142.3 |
| 5.060000000 | 157.9 |
| 5.080000000 | 152.2 |
| 5.100000000 | 143.7 |
| 5.120000000 | 160.8 |
| 5.140000000 | 147.0 |
| 5.160000000 | 153.6 |
| 5.180000000 | 172.1 |
| 5.200000000 | 154.8 |
| 5.220000000 | 153.6 |
| 5.240000000 | 159.9 |
| 5.260000000 | 176.2 |
| 5.280000000 | 162.7 |
| 5.300000000 | 149.8 |
| 5.320000000 | 156.7 |
| 5.340000000 | 147.6 |
| 5.360000000 | 165.9 |
| 5.380000000 | 161.3 |
| 5.400000000 | 165.7 |
| 5.420000000 | 153.3 |
| 5.440000000 | 164.0 |
| 5.460000000 | 163.7 |
| 5.480000000 | 178.8 |
| 5.500000000 | 157.2 |
| 5.520000000 | 165.1 |
| 5.540000000 | 160.1 |
| 5.560000000 | 146.1 |
| 5.580000000 | 165.7 |
| 5.600000000 | 153.2 |
| 5.620000000 | 159.5 |
| 5.640000000 | 168.9 |
| 5.660000000 | 174.9 |
| 5.680000000 | 161.5 |
| 5.700000000 | 167.4 |
| 5.720000000 | 161.6 |
| 5.740000000 | 167.6 |
| 5.760000000 | 168.2 |
| 5.780000000 | 188.6 |
| 5.800000000 | 173.9 |
| 5.820000000 | 182.7 |
| 5.840000000 | 198.3 |
| 5.860000000 | 150.0 |
| 5.880000000 | 180.5 |
| 5.900000000 | 185.7 |
| 5.920000000 | 188.0 |
| 5.940000000 | 202.4 |
| 5.960000000 | 197.9 |
| 5.980000000 | 217.8 |
| 6.000000000 | 209.1 |
| 6.020000000 | 198.7 |
| 6.040000000 | 223.1 |
| 6.060000000 | 203.0 |
| 6.080000000 | 211.3 |
| 6.100000000 | 194.0 |
| 6.120000000 | 203.1 |
| 6.140000000 | 209.7 |
| 6.160000000 | 234.2 |
| 6.180000000 | 195.8 |
| 6.200000000 | 191.5 |
| 6.220000000 | 201.6 |
| 6.240000000 | 202.6 |
| 6.260000000 | 230.3 |
| 6.280000000 | 225.6 |
| 6.300000000 | 241.1 |

|             |       |
|-------------|-------|
| 6.320000000 | 226.6 |
| 6.340000000 | 214.3 |
| 6.360000000 | 236.9 |
| 6.380000000 | 231.9 |
| 6.400000000 | 225.0 |
| 6.420000000 | 234.9 |
| 6.440000000 | 247.2 |
| 6.460000000 | 225.6 |
| 6.480000000 | 222.1 |
| 6.500000000 | 234.5 |
| 6.520000000 | 235.1 |
| 6.540000000 | 267.2 |
| 6.560000000 | 225.8 |
| 6.580000000 | 221.8 |
| 6.600000000 | 225.9 |
| 6.620000000 | 233.5 |
| 6.640000000 | 228.6 |
| 6.660000000 | 212.2 |
| 6.680000000 | 225.5 |
| 6.700000000 | 225.3 |
| 6.720000000 | 218.8 |
| 6.740000000 | 207.2 |
| 6.760000000 | 206.0 |
| 6.780000000 | 217.2 |
| 6.800000000 | 211.4 |
| 6.820000000 | 206.8 |
| 6.840000000 | 195.4 |
| 6.860000000 | 210.6 |
| 6.880000000 | 189.0 |
| 6.900000000 | 182.5 |
| 6.920000000 | 183.6 |
| 6.940000000 | 197.3 |
| 6.960000000 | 172.1 |
| 6.980000000 | 180.7 |
| 7.000000000 | 169.0 |
| 7.020000000 | 162.3 |
| 7.040000000 | 180.3 |
| 7.060000000 | 181.4 |
| 7.080000000 | 178.5 |
| 7.100000000 | 177.6 |
| 7.120000000 | 180.1 |
| 7.140000000 | 164.8 |
| 7.160000000 | 180.7 |
| 7.180000000 | 177.9 |
| 7.200000000 | 156.0 |
| 7.220000000 | 155.6 |
| 7.240000000 | 151.2 |
| 7.260000000 | 143.5 |
| 7.280000000 | 154.3 |
| 7.300000000 | 128.6 |
| 7.320000000 | 151.0 |
| 7.340000000 | 168.3 |
| 7.360000000 | 154.4 |
| 7.380000000 | 158.1 |
| 7.400000000 | 159.6 |
| 7.420000000 | 160.0 |
| 7.440000000 | 165.9 |
| 7.460000000 | 174.3 |
| 7.480000000 | 171.2 |
| 7.500000000 | 167.6 |
| 7.520000000 | 146.7 |
| 7.540000000 | 154.1 |
| 7.560000000 | 140.0 |
| 7.580000000 | 166.8 |
| 7.600000000 | 162.4 |

|             |       |
|-------------|-------|
| 7.620000000 | 148.3 |
| 7.640000000 | 144.2 |
| 7.660000000 | 139.5 |
| 7.680000000 | 158.2 |
| 7.700000000 | 143.7 |
| 7.720000000 | 153.1 |
| 7.740000000 | 172.9 |
| 7.760000000 | 158.1 |
| 7.780000000 | 154.2 |
| 7.800000000 | 157.8 |
| 7.820000000 | 145.0 |
| 7.840000000 | 141.7 |
| 7.860000000 | 152.8 |
| 7.880000000 | 153.7 |
| 7.900000000 | 142.5 |
| 7.920000000 | 149.5 |
| 7.940000000 | 136.6 |
| 7.960000000 | 151.5 |
| 7.980000000 | 155.0 |
| 8.000000000 | 157.8 |
| 8.020000000 | 155.9 |
| 8.040000000 | 155.1 |
| 8.060000000 | 166.3 |
| 8.080000000 | 149.3 |
| 8.100000000 | 139.7 |
| 8.120000000 | 138.8 |
| 8.140000000 | 141.2 |
| 8.160000000 | 149.5 |
| 8.180000000 | 148.1 |
| 8.200000000 | 162.0 |
| 8.220000000 | 165.4 |
| 8.240000000 | 167.7 |
| 8.260000000 | 137.5 |
| 8.280000000 | 170.1 |
| 8.300000000 | 151.0 |
| 8.320000000 | 146.5 |
| 8.340000000 | 146.7 |
| 8.360000000 | 150.3 |
| 8.380000000 | 163.1 |
| 8.400000000 | 166.1 |
| 8.420000000 | 148.3 |
| 8.440000000 | 140.3 |
| 8.460000000 | 164.3 |
| 8.480000000 | 161.6 |
| 8.500000000 | 148.9 |
| 8.520000000 | 149.6 |
| 8.540000000 | 146.8 |
| 8.560000000 | 145.3 |
| 8.580000000 | 149.7 |
| 8.600000000 | 134.1 |
| 8.620000000 | 152.6 |
| 8.640000000 | 150.5 |
| 8.660000000 | 160.9 |
| 8.680000000 | 134.1 |
| 8.700000000 | 154.2 |
| 8.720000000 | 150.3 |
| 8.740000000 | 150.4 |
| 8.760000000 | 172.9 |
| 8.780000000 | 142.7 |
| 8.800000000 | 172.1 |
| 8.820000000 | 157.0 |
| 8.840000000 | 146.5 |
| 8.860000000 | 141.7 |
| 8.880000000 | 137.3 |
| 8.900000000 | 145.0 |

8.920000000 159.2  
8.940000000 158.3  
8.960000000 167.1  
8.980000000 152.4  
9.000000000 162.9  
9.020000000 161.9  
9.040000000 173.7  
9.060000000 156.0  
9.080000000 153.9  
9.100000000 175.7  
9.120000000 166.8  
9.140000000 173.8  
9.160000000 162.1  
9.180000000 175.9  
9.200000000 151.1  
9.220000000 169.6  
9.240000000 166.8  
9.260000000 167.9  
9.280000000 158.2  
9.300000000 180.7  
9.320000000 166.4  
9.340000000 158.5  
9.360000000 175.6  
9.380000000 179.3  
9.400000000 148.8  
9.420000000 166.6  
9.440000000 162.7  
9.460000000 163.0  
9.480000000 153.8  
9.500000000 191.4  
9.520000000 165.3  
9.540000000 175.1  
9.560000000 187.3  
9.580000000 173.1  
9.600000000 171.8  
9.620000000 186.9  
9.640000000 175.5  
9.660000000 199.3  
9.680000000 180.2  
9.700000000 188.8  
9.720000000 190.2  
9.740000000 165.8  
9.760000000 173.0  
9.780000000 181.6  
9.800000000 188.1  
9.820000000 177.2  
9.840000000 174.7  
9.860000000 185.5  
9.880000000 162.2  
9.900000000 166.2  
9.920000000 186.8  
9.940000000 176.4  
9.960000000 175.6  
9.980000000 171.7  
10.000000000 193.1  
10.020000000 188.9  
10.040000000 202.7  
10.060000000 202.5  
10.080000000 180.0  
10.100000000 208.4  
10.120000000 211.9  
10.140000000 191.9  
10.160000000 191.9  
10.180000000 200.3  
10.200000000 196.8

|              |       |
|--------------|-------|
| 10.220000000 | 204.3 |
| 10.240000000 | 184.6 |
| 10.260000000 | 169.6 |
| 10.280000000 | 170.3 |
| 10.300000000 | 179.0 |
| 10.320000000 | 212.5 |
| 10.340000000 | 192.9 |
| 10.360000000 | 178.9 |
| 10.380000000 | 186.0 |
| 10.400000000 | 201.4 |
| 10.420000000 | 199.2 |
| 10.440000000 | 213.8 |
| 10.460000000 | 215.4 |
| 10.480000000 | 212.4 |
| 10.500000000 | 195.2 |
| 10.520000000 | 191.0 |
| 10.540000000 | 212.0 |
| 10.560000000 | 256.1 |
| 10.580000000 | 233.7 |
| 10.600000000 | 232.5 |
| 10.620000000 | 251.7 |
| 10.640000000 | 258.1 |
| 10.660000000 | 256.7 |
| 10.680000000 | 258.0 |
| 10.700000000 | 273.1 |
| 10.720000000 | 268.3 |
| 10.740000000 | 298.8 |
| 10.760000000 | 329.0 |
| 10.780000000 | 353.6 |
| 10.800000000 | 363.5 |
| 10.820000000 | 368.8 |
| 10.840000000 | 329.3 |
| 10.860000000 | 321.8 |
| 10.880000000 | 286.8 |
| 10.900000000 | 293.3 |
| 10.920000000 | 238.6 |
| 10.940000000 | 246.3 |
| 10.960000000 | 248.3 |
| 10.980000000 | 214.3 |
| 11.000000000 | 224.8 |
| 11.020000000 | 215.4 |
| 11.040000000 | 244.2 |
| 11.060000000 | 236.5 |
| 11.080000000 | 233.8 |
| 11.100000000 | 216.3 |
| 11.120000000 | 211.5 |
| 11.140000000 | 218.5 |
| 11.160000000 | 222.2 |
| 11.180000000 | 227.3 |
| 11.200000000 | 203.8 |
| 11.220000000 | 206.2 |
| 11.240000000 | 190.5 |
| 11.260000000 | 241.5 |
| 11.280000000 | 205.7 |
| 11.300000000 | 225.5 |
| 11.320000000 | 218.8 |
| 11.340000000 | 212.3 |
| 11.360000000 | 212.7 |
| 11.380000000 | 228.3 |
| 11.400000000 | 211.7 |
| 11.420000000 | 236.7 |
| 11.440000000 | 232.0 |
| 11.460000000 | 234.2 |
| 11.480000000 | 213.3 |
| 11.500000000 | 215.8 |

|              |       |
|--------------|-------|
| 11.520000000 | 224.1 |
| 11.540000000 | 241.6 |
| 11.560000000 | 205.1 |
| 11.580000000 | 222.8 |
| 11.600000000 | 225.5 |
| 11.620000000 | 217.4 |
| 11.640000000 | 220.5 |
| 11.660000000 | 197.0 |
| 11.680000000 | 215.3 |
| 11.700000000 | 208.2 |
| 11.720000000 | 215.0 |
| 11.740000000 | 203.0 |
| 11.760000000 | 233.2 |
| 11.780000000 | 242.1 |
| 11.800000000 | 226.0 |
| 11.820000000 | 222.1 |
| 11.840000000 | 211.2 |
| 11.860000000 | 210.4 |
| 11.880000000 | 214.7 |
| 11.900000000 | 215.6 |
| 11.920000000 | 205.1 |
| 11.940000000 | 231.2 |
| 11.960000000 | 200.8 |
| 11.980000000 | 211.9 |
| 12.000000000 | 221.8 |
| 12.020000000 | 217.5 |
| 12.040000000 | 256.1 |
| 12.060000000 | 216.9 |
| 12.080000000 | 225.6 |
| 12.100000000 | 218.3 |
| 12.120000000 | 234.5 |
| 12.140000000 | 233.5 |
| 12.160000000 | 226.9 |
| 12.180000000 | 243.8 |
| 12.200000000 | 217.2 |
| 12.220000000 | 255.0 |
| 12.240000000 | 246.8 |
| 12.260000000 | 254.6 |
| 12.280000000 | 263.4 |
| 12.300000000 | 286.8 |
| 12.320000000 | 276.7 |
| 12.340000000 | 239.0 |
| 12.360000000 | 248.2 |
| 12.380000000 | 239.2 |
| 12.400000000 | 229.1 |
| 12.420000000 | 214.0 |
| 12.440000000 | 221.5 |
| 12.460000000 | 223.1 |
| 12.480000000 | 223.7 |
| 12.500000000 | 224.0 |
| 12.520000000 | 216.2 |
| 12.540000000 | 232.9 |
| 12.560000000 | 238.9 |
| 12.580000000 | 220.0 |
| 12.600000000 | 240.4 |
| 12.620000000 | 237.0 |
| 12.640000000 | 216.6 |
| 12.660000000 | 209.9 |
| 12.680000000 | 206.0 |
| 12.700000000 | 201.0 |
| 12.720000000 | 211.1 |
| 12.740000000 | 222.4 |
| 12.760000000 | 220.4 |
| 12.780000000 | 206.9 |
| 12.800000000 | 220.3 |

|              |       |
|--------------|-------|
| 12.820000000 | 207.7 |
| 12.840000000 | 193.6 |
| 12.860000000 | 199.3 |
| 12.880000000 | 209.8 |
| 12.900000000 | 199.9 |
| 12.920000000 | 190.3 |
| 12.940000000 | 228.0 |
| 12.960000000 | 192.1 |
| 12.980000000 | 202.6 |
| 13.000000000 | 187.0 |
| 13.020000000 | 194.2 |
| 13.040000000 | 204.9 |
| 13.060000000 | 185.2 |
| 13.080000000 | 192.6 |
| 13.100000000 | 196.5 |
| 13.120000000 | 193.8 |
| 13.140000000 | 200.1 |
| 13.160000000 | 174.8 |
| 13.180000000 | 208.4 |
| 13.200000000 | 186.7 |
| 13.220000000 | 178.4 |
| 13.240000000 | 190.8 |
| 13.260000000 | 203.7 |
| 13.280000000 | 193.3 |
| 13.300000000 | 198.3 |
| 13.320000000 | 198.2 |
| 13.340000000 | 187.7 |
| 13.360000000 | 179.1 |
| 13.380000000 | 196.2 |
| 13.400000000 | 184.3 |
| 13.420000000 | 191.7 |
| 13.440000000 | 183.8 |
| 13.460000000 | 195.3 |
| 13.480000000 | 188.9 |
| 13.500000000 | 186.7 |
| 13.520000000 | 184.6 |
| 13.540000000 | 198.1 |
| 13.560000000 | 215.4 |
| 13.580000000 | 176.5 |
| 13.600000000 | 184.8 |
| 13.620000000 | 185.5 |
| 13.640000000 | 188.3 |
| 13.660000000 | 177.0 |
| 13.680000000 | 184.0 |
| 13.700000000 | 185.4 |
| 13.720000000 | 171.2 |
| 13.740000000 | 178.3 |
| 13.760000000 | 196.4 |
| 13.780000000 | 166.3 |
| 13.800000000 | 192.7 |
| 13.820000000 | 207.3 |
| 13.840000000 | 200.6 |
| 13.860000000 | 203.1 |
| 13.880000000 | 218.0 |
| 13.900000000 | 206.8 |
| 13.920000000 | 218.6 |
| 13.940000000 | 219.1 |
| 13.960000000 | 224.7 |
| 13.980000000 | 239.2 |
| 14.000000000 | 230.5 |
| 14.020000000 | 250.1 |
| 14.040000000 | 233.9 |
| 14.060000000 | 259.9 |
| 14.080000000 | 234.1 |
| 14.100000000 | 242.4 |

|              |       |
|--------------|-------|
| 14.120000000 | 251.3 |
| 14.140000000 | 228.5 |
| 14.160000000 | 201.3 |
| 14.180000000 | 204.6 |
| 14.200000000 | 167.7 |
| 14.220000000 | 187.2 |
| 14.240000000 | 174.0 |
| 14.260000000 | 166.4 |
| 14.280000000 | 175.9 |
| 14.300000000 | 173.8 |
| 14.320000000 | 169.5 |
| 14.340000000 | 175.1 |
| 14.360000000 | 187.7 |
| 14.380000000 | 137.2 |
| 14.400000000 | 183.5 |
| 14.420000000 | 173.6 |
| 14.440000000 | 171.8 |
| 14.460000000 | 166.2 |
| 14.480000000 | 204.3 |
| 14.500000000 | 164.5 |
| 14.520000000 | 184.1 |
| 14.540000000 | 183.2 |
| 14.560000000 | 170.5 |
| 14.580000000 | 169.8 |
| 14.600000000 | 194.2 |
| 14.620000000 | 177.6 |
| 14.640000000 | 167.5 |
| 14.660000000 | 173.1 |
| 14.680000000 | 193.6 |
| 14.700000000 | 206.0 |
| 14.720000000 | 209.0 |
| 14.740000000 | 226.9 |
| 14.760000000 | 211.1 |
| 14.780000000 | 230.7 |
| 14.800000000 | 241.4 |
| 14.820000000 | 237.3 |
| 14.840000000 | 256.6 |
| 14.860000000 | 284.8 |
| 14.880000000 | 325.8 |
| 14.900000000 | 359.6 |
| 14.920000000 | 382.5 |
| 14.940000000 | 428.5 |
| 14.960000000 | 443.9 |
| 14.980000000 | 480.3 |
| 15.000000000 | 502.3 |
| 15.020000000 | 493.5 |
| 15.040000000 | 528.7 |
| 15.060000000 | 513.3 |
| 15.080000000 | 394.8 |
| 15.100000000 | 336.1 |
| 15.120000000 | 299.2 |
| 15.140000000 | 244.5 |
| 15.160000000 | 226.3 |
| 15.180000000 | 210.8 |
| 15.200000000 | 203.0 |
| 15.220000000 | 184.7 |
| 15.240000000 | 188.2 |
| 15.260000000 | 182.6 |
| 15.280000000 | 180.5 |
| 15.300000000 | 173.5 |
| 15.320000000 | 185.8 |
| 15.340000000 | 172.5 |
| 15.360000000 | 176.4 |
| 15.380000000 | 171.2 |
| 15.400000000 | 180.7 |

15.420000000 168.9  
15.440000000 181.2  
15.460000000 165.8  
15.480000000 171.4  
15.500000000 172.0  
15.520000000 166.3  
15.540000000 180.4  
15.560000000 167.5  
15.580000000 195.7  
15.600000000 158.9  
15.620000000 157.9  
15.640000000 160.0  
15.660000000 181.7  
15.680000000 166.8  
15.700000000 161.0  
15.720000000 187.9  
15.740000000 171.9  
15.760000000 157.9  
15.780000000 149.7  
15.800000000 174.5  
15.820000000 157.0  
15.840000000 151.2  
15.860000000 145.9  
15.880000000 170.9  
15.900000000 131.3  
15.920000000 169.8  
15.940000000 172.5  
15.960000000 200.8  
15.980000000 171.7  
16.000000000 171.8  
16.020000000 171.6  
16.040000000 188.2  
16.060000000 201.8  
16.080000000 171.4  
16.100000000 218.1  
16.120000000 194.6  
16.140000000 217.3  
16.160000000 226.7  
16.180000000 220.1  
16.200000000 226.4  
16.220000000 228.8  
16.240000000 251.2  
16.260000000 240.8  
16.280000000 223.0  
16.300000000 212.6  
16.320000000 217.5  
16.340000000 198.9  
16.360000000 209.3  
16.380000000 194.9  
16.400000000 181.7  
16.420000000 184.1  
16.440000000 186.7  
16.460000000 193.9  
16.480000000 200.0  
16.500000000 204.2  
16.520000000 222.7  
16.540000000 260.3  
16.560000000 236.1  
16.580000000 253.9  
16.600000000 281.0  
16.620000000 320.6  
16.640000000 370.7  
16.660000000 452.3  
16.680000000 477.0  
16.700000000 514.1

|              |        |
|--------------|--------|
| 16.720000000 | 666.1  |
| 16.740000000 | 701.4  |
| 16.760000000 | 774.9  |
| 16.780000000 | 823.3  |
| 16.800000000 | 840.8  |
| 16.820000000 | 845.9  |
| 16.840000000 | 860.2  |
| 16.860000000 | 806.6  |
| 16.880000000 | 713.4  |
| 16.900000000 | 607.1  |
| 16.920000000 | 551.8  |
| 16.940000000 | 468.3  |
| 16.960000000 | 402.7  |
| 16.980000000 | 392.8  |
| 17.000000000 | 429.1  |
| 17.020000000 | 448.6  |
| 17.040000000 | 485.5  |
| 17.060000000 | 534.3  |
| 17.080000000 | 645.0  |
| 17.100000000 | 757.4  |
| 17.120000000 | 895.3  |
| 17.140000000 | 1107.1 |
| 17.160000000 | 1285.8 |
| 17.180000000 | 1474.1 |
| 17.200000000 | 1690.2 |
| 17.220000000 | 1854.9 |
| 17.240000000 | 1799.3 |
| 17.260000000 | 1733.1 |
| 17.280000000 | 1563.9 |
| 17.300000000 | 1434.8 |
| 17.320000000 | 1248.9 |
| 17.340000000 | 968.6  |
| 17.360000000 | 806.2  |
| 17.380000000 | 717.8  |
| 17.400000000 | 636.8  |
| 17.420000000 | 543.4  |
| 17.440000000 | 458.7  |
| 17.460000000 | 420.3  |
| 17.480000000 | 409.5  |
| 17.500000000 | 381.7  |
| 17.520000000 | 379.4  |
| 17.540000000 | 383.8  |
| 17.560000000 | 378.2  |
| 17.580000000 | 341.5  |
| 17.600000000 | 332.5  |
| 17.620000000 | 330.0  |
| 17.640000000 | 305.2  |
| 17.660000000 | 336.9  |
| 17.680000000 | 322.1  |
| 17.700000000 | 323.4  |
| 17.720000000 | 306.0  |
| 17.740000000 | 304.6  |
| 17.760000000 | 298.5  |
| 17.780000000 | 298.7  |
| 17.800000000 | 297.2  |
| 17.820000000 | 304.2  |
| 17.840000000 | 331.5  |
| 17.860000000 | 341.7  |
| 17.880000000 | 310.0  |
| 17.900000000 | 328.0  |
| 17.920000000 | 323.7  |
| 17.940000000 | 304.1  |
| 17.960000000 | 310.9  |
| 17.980000000 | 306.6  |
| 18.000000000 | 303.7  |

|              |        |
|--------------|--------|
| 18.020000000 | 305.9  |
| 18.040000000 | 278.3  |
| 18.060000000 | 259.3  |
| 18.080000000 | 264.5  |
| 18.100000000 | 230.2  |
| 18.120000000 | 208.5  |
| 18.140000000 | 224.5  |
| 18.160000000 | 191.0  |
| 18.180000000 | 214.6  |
| 18.200000000 | 215.1  |
| 18.220000000 | 197.7  |
| 18.240000000 | 201.6  |
| 18.260000000 | 209.8  |
| 18.280000000 | 215.8  |
| 18.300000000 | 205.8  |
| 18.320000000 | 192.0  |
| 18.340000000 | 209.9  |
| 18.360000000 | 211.9  |
| 18.380000000 | 204.7  |
| 18.400000000 | 215.7  |
| 18.420000000 | 219.4  |
| 18.440000000 | 231.8  |
| 18.460000000 | 230.6  |
| 18.480000000 | 230.2  |
| 18.500000000 | 230.9  |
| 18.520000000 | 236.0  |
| 18.540000000 | 247.7  |
| 18.560000000 | 275.2  |
| 18.580000000 | 274.8  |
| 18.600000000 | 288.0  |
| 18.620000000 | 307.6  |
| 18.640000000 | 347.3  |
| 18.660000000 | 386.4  |
| 18.680000000 | 434.0  |
| 18.700000000 | 459.1  |
| 18.720000000 | 565.1  |
| 18.740000000 | 699.3  |
| 18.760000000 | 865.8  |
| 18.780000000 | 992.1  |
| 18.800000000 | 1229.1 |
| 18.820000000 | 1383.7 |
| 18.840000000 | 1492.1 |
| 18.860000000 | 1561.8 |
| 18.880000000 | 1692.0 |
| 18.900000000 | 1744.5 |
| 18.920000000 | 1729.3 |
| 18.940000000 | 1746.1 |
| 18.960000000 | 1568.4 |
| 18.980000000 | 1538.3 |
| 19.000000000 | 1342.6 |
| 19.020000000 | 1167.0 |
| 19.040000000 | 971.7  |
| 19.060000000 | 921.3  |
| 19.080000000 | 830.8  |
| 19.100000000 | 840.4  |
| 19.120000000 | 837.6  |
| 19.140000000 | 849.3  |
| 19.160000000 | 866.8  |
| 19.180000000 | 930.0  |
| 19.200000000 | 934.0  |
| 19.220000000 | 976.8  |
| 19.240000000 | 1067.3 |
| 19.260000000 | 1285.2 |
| 19.280000000 | 1382.4 |
| 19.300000000 | 1623.8 |

|              |        |
|--------------|--------|
| 19.320000000 | 1978.9 |
| 19.340000000 | 2328.8 |
| 19.360000000 | 2694.8 |
| 19.380000000 | 3078.1 |
| 19.400000000 | 3539.5 |
| 19.420000000 | 3952.2 |
| 19.440000000 | 4217.5 |
| 19.460000000 | 4359.6 |
| 19.480000000 | 4344.3 |
| 19.500000000 | 4121.7 |
| 19.520000000 | 3731.7 |
| 19.540000000 | 3208.3 |
| 19.560000000 | 2618.2 |
| 19.580000000 | 2055.3 |
| 19.600000000 | 1640.2 |
| 19.620000000 | 1297.4 |
| 19.640000000 | 998.6  |
| 19.660000000 | 785.0  |
| 19.680000000 | 701.1  |
| 19.700000000 | 541.6  |
| 19.720000000 | 512.5  |
| 19.740000000 | 445.8  |
| 19.760000000 | 403.6  |
| 19.780000000 | 373.8  |
| 19.800000000 | 333.9  |
| 19.820000000 | 326.1  |
| 19.840000000 | 338.9  |
| 19.860000000 | 319.4  |
| 19.880000000 | 351.6  |
| 19.900000000 | 340.8  |
| 19.920000000 | 355.8  |
| 19.940000000 | 380.1  |
| 19.960000000 | 405.4  |
| 19.980000000 | 457.9  |
| 20.000000000 | 434.7  |
| 20.020000000 | 495.8  |
| 20.040000000 | 572.3  |
| 20.060000000 | 613.8  |
| 20.080000000 | 651.9  |
| 20.100000000 | 787.9  |
| 20.120000000 | 876.8  |
| 20.140000000 | 1009.6 |
| 20.160000000 | 1113.0 |
| 20.180000000 | 1212.3 |
| 20.200000000 | 1370.7 |
| 20.220000000 | 1590.4 |
| 20.240000000 | 1720.3 |
| 20.260000000 | 1826.0 |
| 20.280000000 | 1865.0 |
| 20.300000000 | 1959.1 |
| 20.320000000 | 1904.0 |
| 20.340000000 | 1776.7 |
| 20.360000000 | 1749.4 |
| 20.380000000 | 1567.1 |
| 20.400000000 | 1497.1 |
| 20.420000000 | 1317.4 |
| 20.440000000 | 1138.8 |
| 20.460000000 | 1046.2 |
| 20.480000000 | 892.9  |
| 20.500000000 | 734.7  |
| 20.520000000 | 659.2  |
| 20.540000000 | 545.4  |
| 20.560000000 | 456.6  |
| 20.580000000 | 378.0  |
| 20.600000000 | 391.3  |

|              |        |
|--------------|--------|
| 20.620000000 | 361.9  |
| 20.640000000 | 351.6  |
| 20.660000000 | 298.6  |
| 20.680000000 | 293.0  |
| 20.700000000 | 270.5  |
| 20.720000000 | 256.8  |
| 20.740000000 | 265.0  |
| 20.760000000 | 285.3  |
| 20.780000000 | 239.4  |
| 20.800000000 | 290.4  |
| 20.820000000 | 293.3  |
| 20.840000000 | 286.0  |
| 20.860000000 | 267.4  |
| 20.880000000 | 265.4  |
| 20.900000000 | 249.9  |
| 20.920000000 | 282.7  |
| 20.940000000 | 289.8  |
| 20.960000000 | 268.9  |
| 20.980000000 | 293.1  |
| 21.000000000 | 253.7  |
| 21.020000000 | 281.5  |
| 21.040000000 | 274.0  |
| 21.060000000 | 305.5  |
| 21.080000000 | 318.1  |
| 21.100000000 | 334.1  |
| 21.120000000 | 305.9  |
| 21.140000000 | 323.0  |
| 21.160000000 | 374.5  |
| 21.180000000 | 390.8  |
| 21.200000000 | 407.2  |
| 21.220000000 | 514.2  |
| 21.240000000 | 562.3  |
| 21.260000000 | 647.4  |
| 21.280000000 | 708.9  |
| 21.300000000 | 816.6  |
| 21.320000000 | 901.7  |
| 21.340000000 | 1020.2 |
| 21.360000000 | 1209.3 |
| 21.380000000 | 1315.3 |
| 21.400000000 | 1398.5 |
| 21.420000000 | 1465.5 |
| 21.440000000 | 1528.6 |
| 21.460000000 | 1591.9 |
| 21.480000000 | 1540.1 |
| 21.500000000 | 1619.2 |
| 21.520000000 | 1572.0 |
| 21.540000000 | 1483.6 |
| 21.560000000 | 1393.0 |
| 21.580000000 | 1253.8 |
| 21.600000000 | 1128.4 |
| 21.620000000 | 1007.2 |
| 21.640000000 | 805.3  |
| 21.660000000 | 685.9  |
| 21.680000000 | 555.1  |
| 21.700000000 | 538.0  |
| 21.720000000 | 534.8  |
| 21.740000000 | 534.0  |
| 21.760000000 | 521.7  |
| 21.780000000 | 513.6  |
| 21.800000000 | 525.9  |
| 21.820000000 | 573.3  |
| 21.840000000 | 595.8  |
| 21.860000000 | 633.2  |
| 21.880000000 | 712.9  |
| 21.900000000 | 680.2  |

|              |       |
|--------------|-------|
| 21.920000000 | 725.2 |
| 21.940000000 | 778.8 |
| 21.960000000 | 823.9 |
| 21.980000000 | 815.8 |
| 22.000000000 | 900.8 |
| 22.020000000 | 918.4 |
| 22.040000000 | 904.2 |
| 22.060000000 | 906.4 |
| 22.080000000 | 843.4 |
| 22.100000000 | 866.5 |
| 22.120000000 | 842.2 |
| 22.140000000 | 788.2 |
| 22.160000000 | 732.0 |
| 22.180000000 | 675.2 |
| 22.200000000 | 580.2 |
| 22.220000000 | 521.0 |
| 22.240000000 | 448.4 |
| 22.260000000 | 438.7 |
| 22.280000000 | 385.2 |
| 22.300000000 | 350.1 |
| 22.320000000 | 335.4 |
| 22.340000000 | 296.8 |
| 22.360000000 | 308.0 |
| 22.380000000 | 291.3 |
| 22.400000000 | 327.3 |
| 22.420000000 | 309.4 |
| 22.440000000 | 322.5 |
| 22.460000000 | 293.0 |
| 22.480000000 | 300.8 |
| 22.500000000 | 310.3 |
| 22.520000000 | 288.3 |
| 22.540000000 | 323.8 |
| 22.560000000 | 326.6 |
| 22.580000000 | 313.6 |
| 22.600000000 | 320.3 |
| 22.620000000 | 315.7 |
| 22.640000000 | 314.6 |
| 22.660000000 | 330.7 |
| 22.680000000 | 330.1 |
| 22.700000000 | 345.7 |
| 22.720000000 | 325.8 |
| 22.740000000 | 330.6 |
| 22.760000000 | 364.1 |
| 22.780000000 | 353.7 |
| 22.800000000 | 328.1 |
| 22.820000000 | 342.4 |
| 22.840000000 | 361.0 |
| 22.860000000 | 368.4 |
| 22.880000000 | 369.0 |
| 22.900000000 | 377.1 |
| 22.920000000 | 425.8 |
| 22.940000000 | 402.2 |
| 22.960000000 | 400.2 |
| 22.980000000 | 427.0 |
| 23.000000000 | 482.4 |
| 23.020000000 | 474.1 |
| 23.040000000 | 492.8 |
| 23.060000000 | 514.2 |
| 23.080000000 | 581.0 |
| 23.100000000 | 616.6 |
| 23.120000000 | 650.3 |
| 23.140000000 | 644.8 |
| 23.160000000 | 678.7 |
| 23.180000000 | 643.4 |
| 23.200000000 | 619.5 |

|              |       |
|--------------|-------|
| 23.220000000 | 653.8 |
| 23.240000000 | 602.6 |
| 23.260000000 | 578.3 |
| 23.280000000 | 569.4 |
| 23.300000000 | 525.3 |
| 23.320000000 | 475.3 |
| 23.340000000 | 450.0 |
| 23.360000000 | 383.1 |
| 23.380000000 | 379.1 |
| 23.400000000 | 346.5 |
| 23.420000000 | 355.7 |
| 23.440000000 | 325.3 |
| 23.460000000 | 294.3 |
| 23.480000000 | 300.6 |
| 23.500000000 | 305.4 |
| 23.520000000 | 306.0 |
| 23.540000000 | 310.9 |
| 23.560000000 | 306.6 |
| 23.580000000 | 303.7 |
| 23.600000000 | 287.0 |
| 23.620000000 | 277.7 |
| 23.640000000 | 314.4 |
| 23.660000000 | 293.5 |
| 23.680000000 | 268.8 |
| 23.700000000 | 289.9 |
| 23.720000000 | 286.5 |
| 23.740000000 | 270.1 |
| 23.760000000 | 298.0 |
| 23.780000000 | 281.7 |
| 23.800000000 | 279.0 |
| 23.820000000 | 278.5 |
| 23.840000000 | 269.0 |
| 23.860000000 | 295.9 |
| 23.880000000 | 297.5 |
| 23.900000000 | 288.5 |
| 23.920000000 | 302.5 |
| 23.940000000 | 259.7 |
| 23.960000000 | 281.8 |
| 23.980000000 | 292.9 |
| 24.000000000 | 298.5 |
| 24.020000000 | 312.3 |
| 24.040000000 | 272.7 |
| 24.060000000 | 293.2 |
| 24.080000000 | 302.7 |
| 24.100000000 | 315.3 |
| 24.120000000 | 306.7 |
| 24.140000000 | 313.7 |
| 24.160000000 | 292.6 |
| 24.180000000 | 296.6 |
| 24.200000000 | 318.4 |
| 24.220000000 | 305.3 |
| 24.240000000 | 314.0 |
| 24.260000000 | 304.7 |
| 24.280000000 | 305.9 |
| 24.300000000 | 291.7 |
| 24.320000000 | 286.8 |
| 24.340000000 | 307.6 |
| 24.360000000 | 326.3 |
| 24.380000000 | 347.1 |
| 24.400000000 | 340.4 |
| 24.420000000 | 344.0 |
| 24.440000000 | 336.4 |
| 24.460000000 | 345.0 |
| 24.480000000 | 346.4 |
| 24.500000000 | 329.3 |

|              |        |
|--------------|--------|
| 24.520000000 | 305.4  |
| 24.540000000 | 317.0  |
| 24.560000000 | 363.0  |
| 24.580000000 | 351.0  |
| 24.600000000 | 365.8  |
| 24.620000000 | 341.7  |
| 24.640000000 | 341.1  |
| 24.660000000 | 348.8  |
| 24.680000000 | 346.6  |
| 24.700000000 | 358.5  |
| 24.720000000 | 345.3  |
| 24.740000000 | 387.8  |
| 24.760000000 | 364.1  |
| 24.780000000 | 379.1  |
| 24.800000000 | 398.4  |
| 24.820000000 | 442.3  |
| 24.840000000 | 437.6  |
| 24.860000000 | 462.9  |
| 24.880000000 | 465.1  |
| 24.900000000 | 515.2  |
| 24.920000000 | 572.2  |
| 24.940000000 | 580.0  |
| 24.960000000 | 676.6  |
| 24.980000000 | 712.6  |
| 25.000000000 | 766.8  |
| 25.020000000 | 885.8  |
| 25.040000000 | 1013.8 |
| 25.060000000 | 1160.7 |
| 25.080000000 | 1334.3 |
| 25.100000000 | 1498.1 |
| 25.120000000 | 1734.0 |
| 25.140000000 | 1762.2 |
| 25.160000000 | 1916.6 |
| 25.180000000 | 2033.1 |
| 25.200000000 | 2140.6 |
| 25.220000000 | 2212.8 |
| 25.240000000 | 2173.3 |
| 25.260000000 | 2134.6 |
| 25.280000000 | 2004.9 |
| 25.300000000 | 1756.0 |
| 25.320000000 | 1580.5 |
| 25.340000000 | 1326.9 |
| 25.360000000 | 1016.3 |
| 25.380000000 | 844.6  |
| 25.400000000 | 707.2  |
| 25.420000000 | 665.6  |
| 25.440000000 | 581.2  |
| 25.460000000 | 497.0  |
| 25.480000000 | 487.4  |
| 25.500000000 | 469.3  |
| 25.520000000 | 432.3  |
| 25.540000000 | 464.5  |
| 25.560000000 | 439.4  |
| 25.580000000 | 495.3  |
| 25.600000000 | 494.1  |
| 25.620000000 | 545.0  |
| 25.640000000 | 562.6  |
| 25.660000000 | 546.4  |
| 25.680000000 | 557.2  |
| 25.700000000 | 586.9  |
| 25.720000000 | 586.1  |
| 25.740000000 | 579.4  |
| 25.760000000 | 599.9  |
| 25.780000000 | 548.6  |
| 25.800000000 | 555.3  |

|              |        |
|--------------|--------|
| 25.820000000 | 533.4  |
| 25.840000000 | 535.2  |
| 25.860000000 | 455.4  |
| 25.880000000 | 496.3  |
| 25.900000000 | 498.0  |
| 25.920000000 | 516.0  |
| 25.940000000 | 524.7  |
| 25.960000000 | 523.8  |
| 25.980000000 | 638.4  |
| 26.000000000 | 702.3  |
| 26.020000000 | 824.9  |
| 26.040000000 | 935.9  |
| 26.060000000 | 1172.2 |
| 26.080000000 | 1397.2 |
| 26.100000000 | 1667.9 |
| 26.120000000 | 1918.4 |
| 26.140000000 | 2091.9 |
| 26.160000000 | 2083.6 |
| 26.180000000 | 1919.5 |
| 26.200000000 | 1812.7 |
| 26.220000000 | 1602.3 |
| 26.240000000 | 1287.5 |
| 26.260000000 | 1045.3 |
| 26.280000000 | 824.0  |
| 26.300000000 | 744.4  |
| 26.320000000 | 671.3  |
| 26.340000000 | 638.0  |
| 26.360000000 | 601.2  |
| 26.380000000 | 534.7  |
| 26.400000000 | 551.6  |
| 26.420000000 | 514.1  |
| 26.440000000 | 512.4  |
| 26.460000000 | 489.2  |
| 26.480000000 | 497.5  |
| 26.500000000 | 455.4  |
| 26.520000000 | 451.8  |
| 26.540000000 | 485.7  |
| 26.560000000 | 490.3  |
| 26.580000000 | 543.9  |
| 26.600000000 | 607.9  |
| 26.620000000 | 721.7  |
| 26.640000000 | 852.8  |
| 26.660000000 | 924.2  |
| 26.680000000 | 1045.9 |
| 26.700000000 | 1192.2 |
| 26.720000000 | 1357.8 |
| 26.740000000 | 1507.4 |
| 26.760000000 | 1559.2 |
| 26.780000000 | 1598.7 |
| 26.800000000 | 1585.3 |
| 26.820000000 | 1558.5 |
| 26.840000000 | 1430.5 |
| 26.860000000 | 1304.5 |
| 26.880000000 | 1057.0 |
| 26.900000000 | 927.6  |
| 26.920000000 | 772.4  |
| 26.940000000 | 686.1  |
| 26.960000000 | 576.2  |
| 26.980000000 | 489.7  |
| 27.000000000 | 485.3  |
| 27.020000000 | 489.5  |
| 27.040000000 | 483.9  |
| 27.060000000 | 447.9  |
| 27.080000000 | 462.4  |
| 27.100000000 | 463.6  |

|              |       |
|--------------|-------|
| 27.120000000 | 428.5 |
| 27.140000000 | 435.9 |
| 27.160000000 | 416.9 |
| 27.180000000 | 427.3 |
| 27.200000000 | 405.5 |
| 27.220000000 | 419.2 |
| 27.240000000 | 443.6 |
| 27.260000000 | 464.3 |
| 27.280000000 | 488.8 |
| 27.300000000 | 480.2 |
| 27.320000000 | 473.9 |
| 27.340000000 | 512.1 |
| 27.360000000 | 568.4 |
| 27.380000000 | 534.0 |
| 27.400000000 | 596.0 |
| 27.420000000 | 666.7 |
| 27.440000000 | 662.7 |
| 27.460000000 | 724.3 |
| 27.480000000 | 756.1 |
| 27.500000000 | 769.0 |
| 27.520000000 | 834.4 |
| 27.540000000 | 795.9 |
| 27.560000000 | 732.7 |
| 27.580000000 | 715.6 |
| 27.600000000 | 642.9 |
| 27.620000000 | 614.7 |
| 27.640000000 | 586.1 |
| 27.660000000 | 565.0 |
| 27.680000000 | 620.5 |
| 27.700000000 | 578.2 |
| 27.720000000 | 557.4 |
| 27.740000000 | 538.6 |
| 27.760000000 | 543.0 |
| 27.780000000 | 533.5 |
| 27.800000000 | 538.2 |
| 27.820000000 | 550.1 |
| 27.840000000 | 552.9 |
| 27.860000000 | 532.3 |
| 27.880000000 | 496.7 |
| 27.900000000 | 463.6 |
| 27.920000000 | 509.3 |
| 27.940000000 | 498.6 |
| 27.960000000 | 469.7 |
| 27.980000000 | 435.8 |
| 28.000000000 | 469.9 |
| 28.020000000 | 490.5 |
| 28.040000000 | 445.3 |
| 28.060000000 | 444.1 |
| 28.080000000 | 455.6 |
| 28.100000000 | 494.2 |
| 28.120000000 | 475.5 |
| 28.140000000 | 467.9 |
| 28.160000000 | 468.1 |
| 28.180000000 | 491.7 |
| 28.200000000 | 512.4 |
| 28.220000000 | 506.5 |
| 28.240000000 | 520.3 |
| 28.260000000 | 527.5 |
| 28.280000000 | 536.2 |
| 28.300000000 | 545.4 |
| 28.320000000 | 586.1 |
| 28.340000000 | 582.7 |
| 28.360000000 | 561.8 |
| 28.380000000 | 565.3 |
| 28.400000000 | 555.4 |

|              |        |
|--------------|--------|
| 28.420000000 | 558.2  |
| 28.440000000 | 543.7  |
| 28.460000000 | 533.8  |
| 28.480000000 | 573.6  |
| 28.500000000 | 573.6  |
| 28.520000000 | 577.9  |
| 28.540000000 | 576.4  |
| 28.560000000 | 564.4  |
| 28.580000000 | 550.5  |
| 28.600000000 | 528.3  |
| 28.620000000 | 563.9  |
| 28.640000000 | 579.0  |
| 28.660000000 | 525.2  |
| 28.680000000 | 514.4  |
| 28.700000000 | 523.1  |
| 28.720000000 | 549.7  |
| 28.740000000 | 576.7  |
| 28.760000000 | 564.7  |
| 28.780000000 | 583.8  |
| 28.800000000 | 624.5  |
| 28.820000000 | 640.7  |
| 28.840000000 | 604.4  |
| 28.860000000 | 618.6  |
| 28.880000000 | 691.8  |
| 28.900000000 | 680.4  |
| 28.920000000 | 682.0  |
| 28.940000000 | 727.6  |
| 28.960000000 | 811.7  |
| 28.980000000 | 906.1  |
| 29.000000000 | 931.6  |
| 29.020000000 | 994.9  |
| 29.040000000 | 1230.1 |
| 29.060000000 | 1465.6 |
| 29.080000000 | 1838.7 |
| 29.100000000 | 2380.5 |
| 29.120000000 | 3199.8 |
| 29.140000000 | 4212.6 |
| 29.160000000 | 5205.2 |
| 29.180000000 | 5707.1 |
| 29.200000000 | 6315.8 |
| 29.220000000 | 6765.4 |
| 29.240000000 | 7300.6 |
| 29.260000000 | 7730.4 |
| 29.280000000 | 7571.2 |
| 29.300000000 | 6986.7 |
| 29.320000000 | 6231.7 |
| 29.340000000 | 5720.2 |
| 29.360000000 | 4881.1 |
| 29.380000000 | 4239.4 |
| 29.400000000 | 3793.6 |
| 29.420000000 | 3336.4 |
| 29.440000000 | 3192.6 |
| 29.460000000 | 3029.1 |
| 29.480000000 | 2870.5 |
| 29.500000000 | 2811.9 |
| 29.520000000 | 2817.4 |
| 29.540000000 | 2696.9 |
| 29.560000000 | 2525.4 |
| 29.580000000 | 2318.3 |
| 29.600000000 | 2086.9 |
| 29.620000000 | 1904.0 |
| 29.640000000 | 1716.6 |
| 29.660000000 | 1496.5 |
| 29.680000000 | 1320.2 |
| 29.700000000 | 1137.0 |

|              |        |
|--------------|--------|
| 29.720000000 | 1071.5 |
| 29.740000000 | 912.4  |
| 29.760000000 | 822.0  |
| 29.780000000 | 784.7  |
| 29.800000000 | 696.2  |
| 29.820000000 | 716.6  |
| 29.840000000 | 714.3  |
| 29.860000000 | 648.4  |
| 29.880000000 | 722.9  |
| 29.900000000 | 660.4  |
| 29.920000000 | 660.1  |
| 29.940000000 | 661.1  |
| 29.960000000 | 629.7  |
| 29.980000000 | 614.9  |
| 30.000000000 | 603.6  |
| 30.020000000 | 641.6  |
| 30.040000000 | 640.0  |
| 30.060000000 | 662.9  |
| 30.080000000 | 648.0  |
| 30.100000000 | 677.1  |
| 30.120000000 | 674.7  |
| 30.140000000 | 731.4  |
| 30.160000000 | 754.8  |
| 30.180000000 | 814.4  |
| 30.200000000 | 848.5  |
| 30.220000000 | 866.0  |
| 30.240000000 | 981.6  |
| 30.260000000 | 1036.4 |
| 30.280000000 | 1157.2 |
| 30.300000000 | 1165.8 |
| 30.320000000 | 1207.5 |
| 30.340000000 | 1163.7 |
| 30.360000000 | 1300.0 |
| 30.380000000 | 1306.4 |
| 30.400000000 | 1215.6 |
| 30.420000000 | 1196.2 |
| 30.440000000 | 1161.9 |
| 30.460000000 | 1146.2 |
| 30.480000000 | 1094.7 |
| 30.500000000 | 1011.9 |
| 30.520000000 | 974.0  |
| 30.540000000 | 918.5  |
| 30.560000000 | 853.2  |
| 30.580000000 | 814.1  |
| 30.600000000 | 796.4  |
| 30.620000000 | 738.8  |
| 30.640000000 | 758.3  |
| 30.660000000 | 849.2  |
| 30.680000000 | 777.2  |
| 30.700000000 | 814.5  |
| 30.720000000 | 808.0  |
| 30.740000000 | 854.9  |
| 30.760000000 | 837.3  |
| 30.780000000 | 872.9  |
| 30.800000000 | 897.2  |
| 30.820000000 | 876.7  |
| 30.840000000 | 887.8  |
| 30.860000000 | 819.6  |
| 30.880000000 | 818.2  |
| 30.900000000 | 790.4  |
| 30.920000000 | 787.5  |
| 30.940000000 | 766.4  |
| 30.960000000 | 727.3  |
| 30.980000000 | 720.1  |
| 31.000000000 | 689.2  |

|              |       |
|--------------|-------|
| 31.020000000 | 653.4 |
| 31.040000000 | 650.6 |
| 31.060000000 | 654.1 |
| 31.080000000 | 631.5 |
| 31.100000000 | 609.0 |
| 31.120000000 | 575.3 |
| 31.140000000 | 575.5 |
| 31.160000000 | 552.8 |
| 31.180000000 | 526.9 |
| 31.200000000 | 546.9 |
| 31.220000000 | 550.0 |
| 31.240000000 | 521.9 |
| 31.260000000 | 504.8 |
| 31.280000000 | 514.7 |
| 31.300000000 | 500.9 |
| 31.320000000 | 534.5 |
| 31.340000000 | 507.3 |
| 31.360000000 | 519.9 |
| 31.380000000 | 544.2 |
| 31.400000000 | 547.3 |
| 31.420000000 | 563.0 |
| 31.440000000 | 544.2 |
| 31.460000000 | 557.8 |
| 31.480000000 | 536.5 |
| 31.500000000 | 539.6 |
| 31.520000000 | 549.9 |
| 31.540000000 | 538.3 |
| 31.560000000 | 557.7 |
| 31.580000000 | 546.8 |
| 31.600000000 | 554.0 |
| 31.620000000 | 547.1 |
| 31.640000000 | 554.7 |
| 31.660000000 | 547.6 |
| 31.680000000 | 508.3 |
| 31.700000000 | 492.8 |
| 31.720000000 | 488.6 |
| 31.740000000 | 502.2 |
| 31.760000000 | 514.9 |
| 31.780000000 | 544.5 |
| 31.800000000 | 528.3 |
| 31.820000000 | 510.7 |
| 31.840000000 | 523.8 |
| 31.860000000 | 477.1 |
| 31.880000000 | 497.8 |
| 31.900000000 | 487.7 |
| 31.920000000 | 512.5 |
| 31.940000000 | 525.9 |
| 31.960000000 | 495.3 |
| 31.980000000 | 522.9 |
| 32.000000000 | 541.2 |
| 32.020000000 | 534.7 |
| 32.040000000 | 517.0 |
| 32.060000000 | 555.4 |
| 32.080000000 | 538.6 |
| 32.100000000 | 543.4 |
| 32.120000000 | 531.9 |
| 32.140000000 | 518.5 |
| 32.160000000 | 505.1 |
| 32.180000000 | 483.3 |
| 32.200000000 | 526.2 |
| 32.220000000 | 546.3 |
| 32.240000000 | 525.7 |
| 32.260000000 | 499.5 |
| 32.280000000 | 569.2 |
| 32.300000000 | 525.8 |

|              |       |
|--------------|-------|
| 32.320000000 | 548.1 |
| 32.340000000 | 534.5 |
| 32.360000000 | 531.9 |
| 32.380000000 | 541.5 |
| 32.400000000 | 516.8 |
| 32.420000000 | 505.2 |
| 32.440000000 | 511.5 |
| 32.460000000 | 520.3 |
| 32.480000000 | 539.5 |
| 32.500000000 | 561.3 |
| 32.520000000 | 539.6 |
| 32.540000000 | 548.7 |
| 32.560000000 | 526.3 |
| 32.580000000 | 521.5 |
| 32.600000000 | 569.1 |
| 32.620000000 | 576.5 |
| 32.640000000 | 547.7 |
| 32.660000000 | 601.3 |
| 32.680000000 | 564.3 |
| 32.700000000 | 587.6 |
| 32.720000000 | 640.3 |
| 32.740000000 | 618.4 |
| 32.760000000 | 601.7 |
| 32.780000000 | 629.6 |
| 32.800000000 | 644.1 |
| 32.820000000 | 610.0 |
| 32.840000000 | 610.3 |
| 32.860000000 | 652.3 |
| 32.880000000 | 690.0 |
| 32.900000000 | 679.7 |
| 32.920000000 | 649.5 |
| 32.940000000 | 686.5 |
| 32.960000000 | 664.7 |
| 32.980000000 | 725.9 |
| 33.000000000 | 731.2 |
| 33.020000000 | 798.4 |
| 33.040000000 | 797.2 |
| 33.060000000 | 875.4 |
| 33.080000000 | 815.4 |
| 33.100000000 | 887.3 |
| 33.120000000 | 919.8 |
| 33.140000000 | 901.9 |
| 33.160000000 | 887.1 |
| 33.180000000 | 877.4 |
| 33.200000000 | 834.4 |
| 33.220000000 | 818.9 |
| 33.240000000 | 806.7 |
| 33.260000000 | 780.9 |
| 33.280000000 | 708.5 |
| 33.300000000 | 742.7 |
| 33.320000000 | 685.9 |
| 33.340000000 | 679.5 |
| 33.360000000 | 740.3 |
| 33.380000000 | 722.7 |
| 33.400000000 | 733.1 |
| 33.420000000 | 749.6 |
| 33.440000000 | 751.3 |
| 33.460000000 | 790.6 |
| 33.480000000 | 827.2 |
| 33.500000000 | 768.5 |
| 33.520000000 | 784.2 |
| 33.540000000 | 814.1 |
| 33.560000000 | 778.2 |
| 33.580000000 | 739.4 |
| 33.600000000 | 771.7 |

|              |       |
|--------------|-------|
| 33.620000000 | 730.0 |
| 33.640000000 | 694.9 |
| 33.660000000 | 660.5 |
| 33.680000000 | 612.8 |
| 33.700000000 | 610.0 |
| 33.720000000 | 615.4 |
| 33.740000000 | 613.9 |
| 33.760000000 | 591.6 |
| 33.780000000 | 583.6 |
| 33.800000000 | 601.1 |
| 33.820000000 | 580.8 |
| 33.840000000 | 589.6 |
| 33.860000000 | 583.0 |
| 33.880000000 | 566.1 |
| 33.900000000 | 553.8 |
| 33.920000000 | 596.6 |
| 33.940000000 | 575.9 |
| 33.960000000 | 580.1 |
| 33.980000000 | 568.1 |
| 34.000000000 | 583.0 |
| 34.020000000 | 535.3 |
| 34.040000000 | 548.7 |
| 34.060000000 | 505.2 |
| 34.080000000 | 559.9 |
| 34.100000000 | 579.0 |
| 34.120000000 | 537.3 |
| 34.140000000 | 564.0 |
| 34.160000000 | 553.4 |
| 34.180000000 | 582.0 |
| 34.200000000 | 546.9 |
| 34.220000000 | 520.0 |
| 34.240000000 | 563.1 |
| 34.260000000 | 566.3 |
| 34.280000000 | 541.2 |
| 34.300000000 | 535.0 |
| 34.320000000 | 547.4 |
| 34.340000000 | 607.0 |
| 34.360000000 | 589.7 |
| 34.380000000 | 548.3 |
| 34.400000000 | 611.9 |
| 34.420000000 | 560.9 |
| 34.440000000 | 581.5 |
| 34.460000000 | 577.3 |
| 34.480000000 | 562.1 |
| 34.500000000 | 614.4 |
| 34.520000000 | 565.6 |
| 34.540000000 | 600.3 |
| 34.560000000 | 575.1 |
| 34.580000000 | 580.9 |
| 34.600000000 | 561.6 |
| 34.620000000 | 581.2 |
| 34.640000000 | 612.0 |
| 34.660000000 | 651.1 |
| 34.680000000 | 618.1 |
| 34.700000000 | 613.5 |
| 34.720000000 | 565.4 |
| 34.740000000 | 565.4 |
| 34.760000000 | 578.1 |
| 34.780000000 | 568.9 |
| 34.800000000 | 611.2 |
| 34.820000000 | 623.5 |
| 34.840000000 | 617.2 |
| 34.860000000 | 622.9 |
| 34.880000000 | 602.6 |
| 34.900000000 | 733.3 |

|              |       |
|--------------|-------|
| 34.920000000 | 687.9 |
| 34.940000000 | 713.0 |
| 34.960000000 | 752.0 |
| 34.980000000 | 772.7 |
| 35.000000000 | 816.3 |
| 35.020000000 | 865.4 |
| 35.040000000 | 865.3 |
| 35.060000000 | 865.4 |
| 35.080000000 | 876.1 |
| 35.100000000 | 911.0 |
| 35.120000000 | 866.1 |
| 35.140000000 | 926.1 |
| 35.160000000 | 936.2 |
| 35.180000000 | 912.0 |
| 35.200000000 | 931.3 |
| 35.220000000 | 885.9 |
| 35.240000000 | 937.2 |
| 35.260000000 | 879.6 |
| 35.280000000 | 880.3 |
| 35.300000000 | 852.0 |
| 35.320000000 | 801.0 |
| 35.340000000 | 800.1 |
| 35.360000000 | 762.0 |
| 35.380000000 | 705.8 |
| 35.400000000 | 669.9 |
| 35.420000000 | 630.5 |
| 35.440000000 | 671.5 |
| 35.460000000 | 595.2 |
| 35.480000000 | 631.1 |
| 35.500000000 | 593.9 |
| 35.520000000 | 694.1 |
| 35.540000000 | 617.0 |
| 35.560000000 | 641.8 |
| 35.580000000 | 661.0 |
| 35.600000000 | 653.4 |
| 35.620000000 | 657.7 |
| 35.640000000 | 707.6 |
| 35.660000000 | 637.5 |
| 35.680000000 | 670.1 |
| 35.700000000 | 716.8 |
| 35.720000000 | 710.7 |
| 35.740000000 | 664.2 |
| 35.760000000 | 671.4 |
| 35.780000000 | 657.1 |
| 35.800000000 | 665.9 |
| 35.820000000 | 754.4 |
| 35.840000000 | 715.0 |
| 35.860000000 | 709.8 |
| 35.880000000 | 729.4 |
| 35.900000000 | 747.4 |
| 35.920000000 | 809.5 |
| 35.940000000 | 800.6 |
| 35.960000000 | 748.9 |
| 35.980000000 | 777.4 |
| 36.000000000 | 743.7 |
| 36.020000000 | 757.9 |
| 36.040000000 | 770.0 |
| 36.060000000 | 767.3 |
| 36.080000000 | 788.4 |
| 36.100000000 | 766.0 |
| 36.120000000 | 760.0 |
| 36.140000000 | 805.1 |
| 36.160000000 | 770.9 |
| 36.180000000 | 743.4 |
| 36.200000000 | 735.5 |

|              |       |
|--------------|-------|
| 36.220000000 | 799.6 |
| 36.240000000 | 773.8 |
| 36.260000000 | 755.4 |
| 36.280000000 | 756.8 |
| 36.300000000 | 785.7 |
| 36.320000000 | 759.4 |
| 36.340000000 | 764.2 |
| 36.360000000 | 749.7 |
| 36.380000000 | 754.4 |
| 36.400000000 | 740.0 |
| 36.420000000 | 701.3 |
| 36.440000000 | 724.1 |
| 36.460000000 | 724.0 |
| 36.480000000 | 778.2 |
| 36.500000000 | 748.6 |
| 36.520000000 | 676.4 |
| 36.540000000 | 673.5 |
| 36.560000000 | 693.6 |
| 36.580000000 | 692.1 |
| 36.600000000 | 644.5 |
| 36.620000000 | 672.7 |
| 36.640000000 | 698.6 |
| 36.660000000 | 603.5 |
| 36.680000000 | 652.3 |
| 36.700000000 | 649.4 |
| 36.720000000 | 621.8 |
| 36.740000000 | 643.9 |
| 36.760000000 | 647.5 |
| 36.780000000 | 631.5 |
| 36.800000000 | 645.3 |
| 36.820000000 | 641.4 |
| 36.840000000 | 600.7 |
| 36.860000000 | 624.9 |
| 36.880000000 | 637.4 |
| 36.900000000 | 634.1 |
| 36.920000000 | 635.4 |
| 36.940000000 | 605.9 |
| 36.960000000 | 650.0 |
| 36.980000000 | 576.5 |
| 37.000000000 | 560.8 |
| 37.020000000 | 603.1 |
| 37.040000000 | 631.9 |
| 37.060000000 | 572.0 |
| 37.080000000 | 583.0 |
| 37.100000000 | 597.7 |
| 37.120000000 | 592.1 |
| 37.140000000 | 580.3 |
| 37.160000000 | 632.8 |
| 37.180000000 | 617.1 |
| 37.200000000 | 564.1 |
| 37.220000000 | 610.4 |
| 37.240000000 | 600.8 |
| 37.260000000 | 558.5 |
| 37.280000000 | 579.2 |
| 37.300000000 | 575.9 |
| 37.320000000 | 573.5 |
| 37.340000000 | 566.0 |
| 37.360000000 | 568.9 |
| 37.380000000 | 560.9 |
| 37.400000000 | 557.3 |
| 37.420000000 | 568.2 |
| 37.440000000 | 578.5 |
| 37.460000000 | 539.4 |
| 37.480000000 | 550.1 |
| 37.500000000 | 562.7 |

37.520000000 565.0  
37.540000000 574.1  
37.560000000 542.0  
37.580000000 549.8  
37.600000000 611.0  
37.620000000 601.8  
37.640000000 531.4  
37.660000000 588.9  
37.680000000 564.0  
37.700000000 586.9  
37.720000000 580.2  
37.740000000 552.3  
37.760000000 558.3  
37.780000000 544.4  
37.800000000 565.6  
37.820000000 563.5  
37.840000000 603.6  
37.860000000 552.9  
37.880000000 555.1  
37.900000000 569.4  
37.920000000 576.2  
37.940000000 578.1  
37.960000000 565.0  
37.980000000 579.3  
38.000000000 589.6  
38.020000000 594.3  
38.040000000 598.3  
38.060000000 570.3  
38.080000000 581.7  
38.100000000 565.3  
38.120000000 573.0  
38.140000000 590.7  
38.160000000 618.4  
38.180000000 583.0  
38.200000000 565.7  
38.220000000 574.0  
38.240000000 600.1  
38.260000000 576.7  
38.280000000 572.9  
38.300000000 607.5  
38.320000000 590.8  
38.340000000 620.3  
38.360000000 567.4  
38.380000000 551.3  
38.400000000 609.1  
38.420000000 606.3  
38.440000000 621.4  
38.460000000 578.7  
38.480000000 615.8  
38.500000000 603.0  
38.520000000 618.3  
38.540000000 602.2  
38.560000000 616.2  
38.580000000 608.7  
38.600000000 614.1  
38.620000000 574.6  
38.640000000 536.5  
38.660000000 629.3  
38.680000000 615.5  
38.700000000 592.2  
38.720000000 572.1  
38.740000000 569.0  
38.760000000 592.6  
38.780000000 629.3  
38.800000000 587.4

|              |       |
|--------------|-------|
| 38.820000000 | 601.7 |
| 38.840000000 | 586.5 |
| 38.860000000 | 592.7 |
| 38.880000000 | 627.9 |
| 38.900000000 | 606.5 |
| 38.920000000 | 621.8 |
| 38.940000000 | 617.8 |
| 38.960000000 | 645.4 |
| 38.980000000 | 741.4 |
| 39.000000000 | 699.3 |
| 39.020000000 | 694.0 |
| 39.040000000 | 717.6 |
| 39.060000000 | 726.6 |
| 39.080000000 | 691.9 |
| 39.100000000 | 684.5 |
| 39.120000000 | 685.2 |
| 39.140000000 | 684.2 |
| 39.160000000 | 689.3 |
| 39.180000000 | 672.9 |
| 39.200000000 | 652.5 |
| 39.220000000 | 669.2 |
| 39.240000000 | 672.8 |
| 39.260000000 | 611.8 |
| 39.280000000 | 604.9 |
| 39.300000000 | 640.5 |
| 39.320000000 | 627.3 |
| 39.340000000 | 651.4 |
| 39.360000000 | 633.9 |
| 39.380000000 | 654.3 |
| 39.400000000 | 672.9 |
| 39.420000000 | 711.3 |
| 39.440000000 | 723.7 |
| 39.460000000 | 739.8 |
| 39.480000000 | 721.3 |
| 39.500000000 | 828.6 |
| 39.520000000 | 818.3 |
| 39.540000000 | 797.4 |
| 39.560000000 | 758.5 |
| 39.580000000 | 817.5 |
| 39.600000000 | 899.4 |
| 39.620000000 | 889.7 |
| 39.640000000 | 901.7 |
| 39.660000000 | 863.0 |
| 39.680000000 | 916.9 |
| 39.700000000 | 912.8 |
| 39.720000000 | 915.9 |
| 39.740000000 | 974.1 |
| 39.760000000 | 948.5 |
| 39.780000000 | 873.3 |
| 39.800000000 | 950.7 |
| 39.820000000 | 895.7 |
| 39.840000000 | 893.5 |
| 39.860000000 | 896.9 |
| 39.880000000 | 845.2 |
| 39.900000000 | 813.2 |
| 39.920000000 | 747.4 |
| 39.940000000 | 759.4 |
| 39.960000000 | 745.0 |
| 39.980000000 | 773.2 |
